# Supplementary material for: Characterization and Genomic Analysis of SFPH2, a Novel T7virus Infecting Shigella
Source: PubMed Central journal article supplement (PMC6302001; doi:10.3389/fmicb.2018.03027), 2018-12-14
Supplement: Data_Sheet_1.pdf [file Data_Sheet_1.pdf]

**Fig. S1 The comparison of fiber protein sequences of *Shigella* phage SFPH2, *Citrobacter* phage SH4 and *Cronobacter* phage Dev2**

The “\*” represents the same amino acid; The blank represents different amino acids.

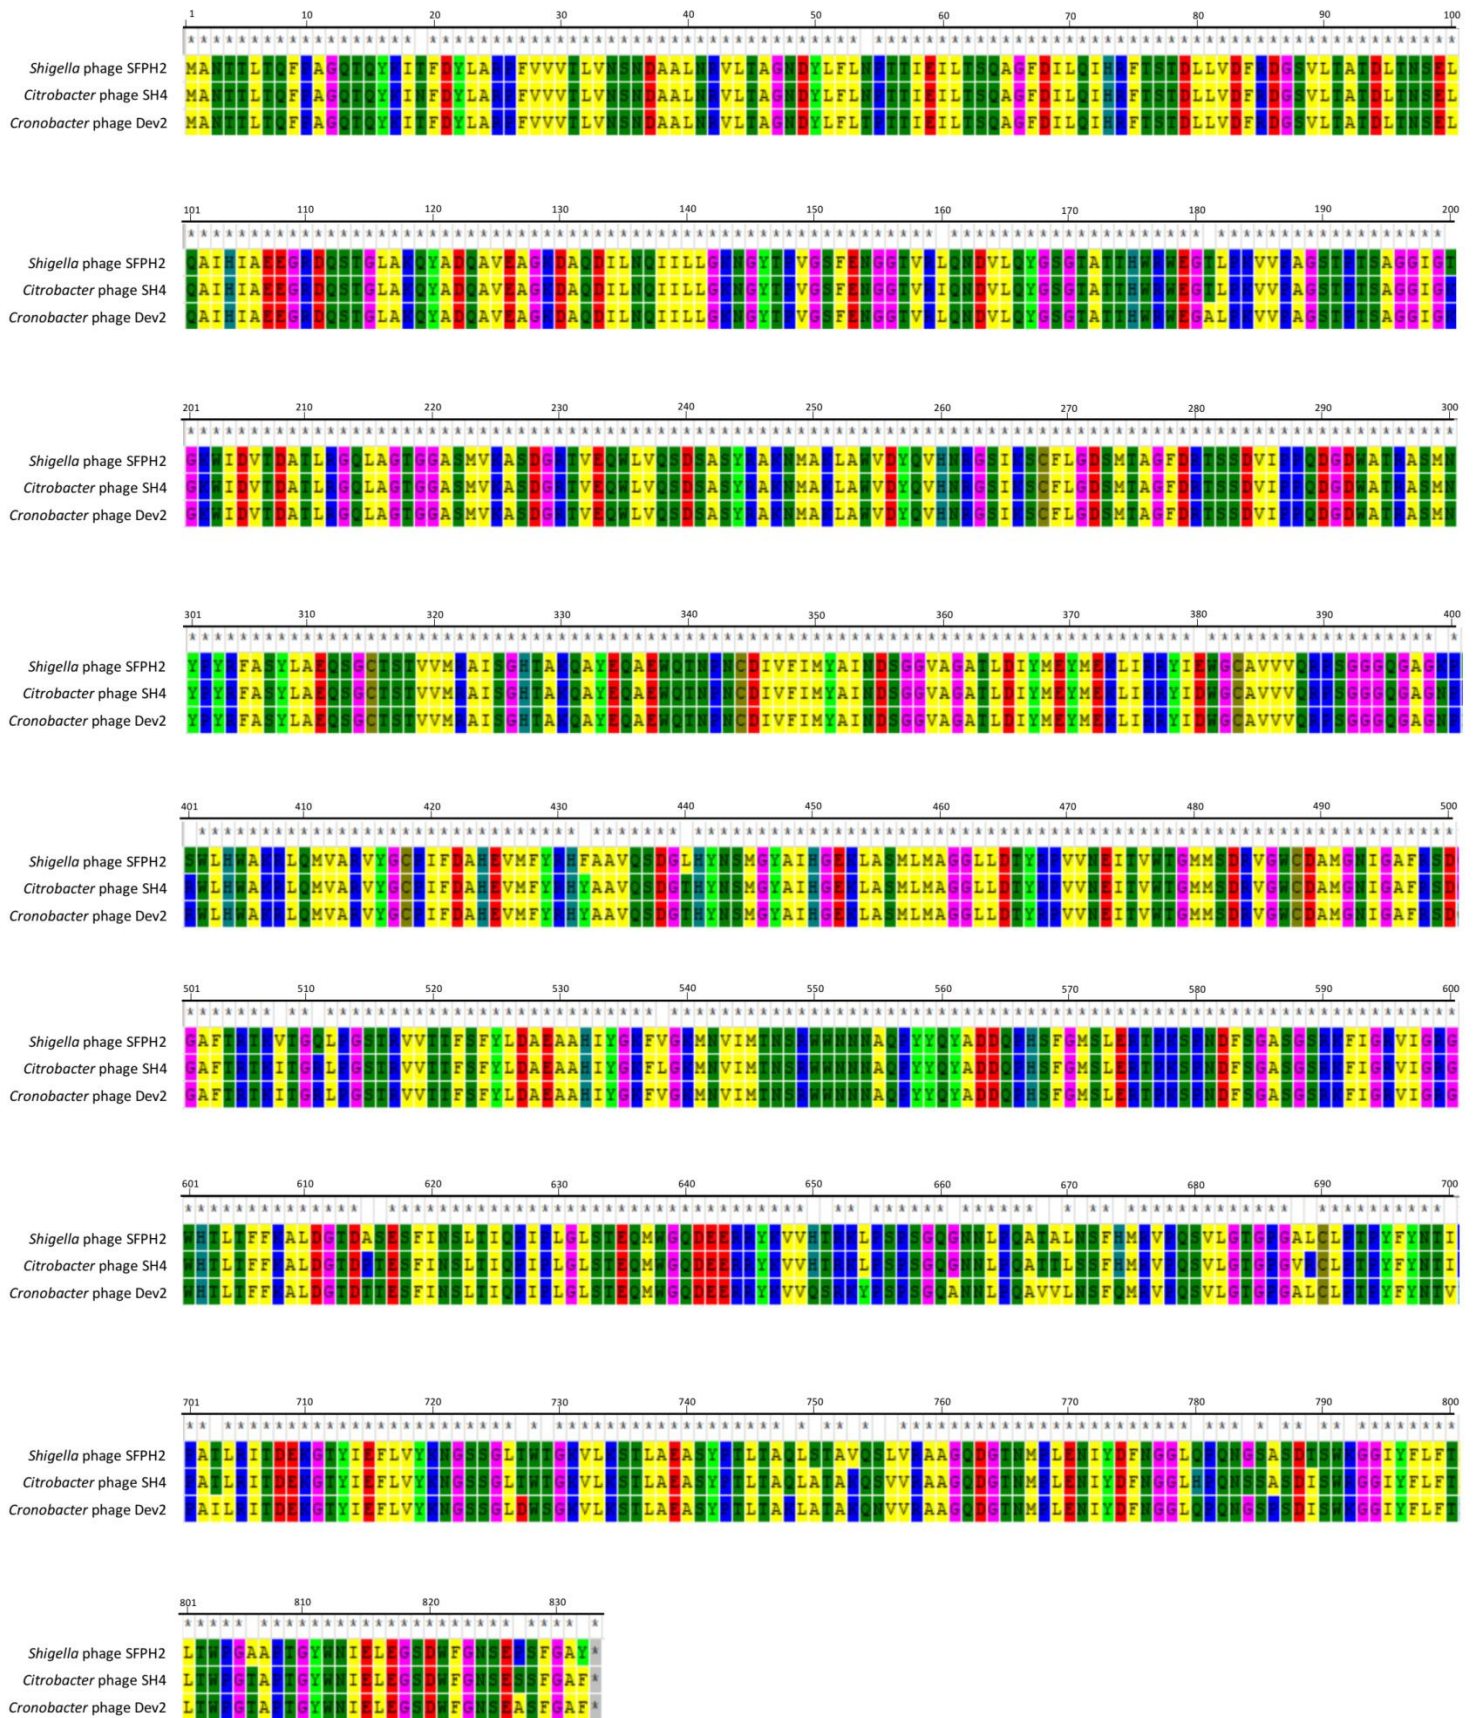

**Table S1 The result of efficiency of plating (EOP) test**

| Strain No. | Serotypes | Efficiency of plating (EOP) | Notes             |
|------------|-----------|-----------------------------|-------------------|
| SF1        | 2a        | 0.83 ±0.03                  | High production   |
| <b>SF2</b> | <b>2a</b> | <b>1</b>                    | High production   |
| SF4        | 2a        | 0.54 ±0.06                  | High production   |
| SF7        | 2a        | 0.43 ±0.11                  | Medium production |
| SF12       | 2a        | 0.47 ±0.05                  | Medium production |
| SF23       | 2a        | 0.58 ±0.13                  | High production   |
| SH2a001    | 2a        | 0.60 ±0.12                  | High production   |
| SH2a002    | 2a        | 0.67 ±0.06                  | High production   |
| SH2a003    | 2a        | 0.43 ±0.17                  | Medium production |
| SH2a004    | 2a        | 0.39 ±0.15                  | Medium production |
| SH2a005    | 2a        | 0.55 ±0.03                  | High production   |
| SH2a006    | 2a        | 0.67 ±0.16                  | High production   |
| SH2a007    | 2a        | 0.72 ±0.12                  | High production   |
| SH2a008    | 2a        | 0.62 ±0.09                  | High production   |
| SH2a009    | 2a        | 0.41 ±0.21                  | Medium production |
| SH2a010    | 2a        | 0.59 ±0.09                  | High production   |
| SH2a011    | 2a        | 0.36 ±0.05                  | Medium production |
| SH2a012    | 2a        | 0.88 ±0.06                  | High production   |
| SH2a013    | 2a        | 0.61 ±0.03                  | High production   |
| SH2a014    | 2a        | 0.56 ±0.14                  | High production   |
| SH2a015    | 2a        | 0.42 ±0.04                  | Medium production |
| SH2a016    | 2a        | 0.74 ±0.07                  | High production   |
| SH2a017    | 2a        | 0.37 ±0.04                  | Medium production |
| SH2a018    | 2a        | 0.61 ±0.07                  | High production   |
| SF9        | 2 variant | 0.15 ±0.04                  | Medium production |
| SF11       | 2 variant | 0.14 ±0.11                  | Medium production |
| SF24       | 2 variant | 0.25 ±0.07                  | Medium production |
| SH2c001    | 2 variant | 0.16 ±0.09                  | Medium production |
| SH2c002    | 2 variant | 0.18 ±0.12                  | Medium production |
| SH2c003    | 2 variant | 0.24 ±0.06                  | Medium production |
| SH2c005    | 2 variant | 0.20 ±0.03                  | Medium production |
| SH2c006    | 2 variant | 0.17 ±0.09                  | Medium production |
| SHY002     | Y         | 0.16 ±0.15                  | Medium production |
| SHY007     | Y         | 0.18 ±0.08                  | Medium production |
| SHY008     | Y         | 0.23 ±0.06                  | Medium production |

EOP = phage titer on target bacteria / phage titer on host bacteria. EOP > 0.5: High production; 0.1 < EOP < 0.5: Medium production (Viazis et al., 2011). Each EOP value is the mean of three measurements, followed by its standard deviation. The plating on the host strain SF2 (EOP = 1.0) is marked in bold.

**Table S2 The result of multiplicity of infection (MOI) test**

| Ratio* | Titer                 |
|--------|-----------------------|
| 100    | $6.23 \times 10^9$    |
| 10     | $5.89 \times 10^9$    |
| 1      | $7.21 \times 10^9$    |
| 0.1    | $1.62 \times 10^{10}$ |
| 0.01   | $1.04 \times 10^{10}$ |

The “\*” represents the ratio of bacteriophage to host strain.

**Table S3 List of *Shigella* phages on NCBI database**

| Phage name                    | GenBank accession no. | Genome length (bp) | Genome type | Taxonomy                                                                                                            |
|-------------------------------|-----------------------|--------------------|-------------|---------------------------------------------------------------------------------------------------------------------|
| Shigella phage SSP1           | KY963424              | 113299 bp          | linear      | Viruses; dsDNA viruses, no RNA stage; Caudovirales; Siphoviridae.                                                   |
| Shigella phage SFN6B          | KY684082              | 43036 bp           | linear      | Viruses; unclassified bacterial viruses                                                                             |
| Shigella phage Sf20           | MF327006              | 163982 bp          | linear      | Viruses; unclassified bacterial viruses                                                                             |
| Shigella phage Sf21           | MF327007              | 166002 bp          | linear      | Viruses; unclassified bacterial viruses                                                                             |
| Shigella phage Sf25           | MF327009              | 168573 bp          | linear      | Viruses; unclassified bacterial viruses.                                                                            |
| Shigella phage Sf24           | MF327008              | 168112 bp          | linear      | Viruses; unclassified bacterial viruses.                                                                            |
| Shigella phage Sf17           | MF327004              | 90092 bp           | linear      | Viruses; unclassified bacterial viruses.                                                                            |
| Shigella phage Sf19           | MF327005              | 90375 bp           | linear      | Viruses; dsDNA viruses, no RNA stage; Caudovirales; Myoviridae; Ounavirinae; Mooglevirus; unclassified Mooglevirus. |
| Shigella phage SHSML-45       | KX130863              | 108050 bp          | linear      | Viruses; dsDNA viruses, no RNA stage; Caudovirales; Siphoviridae; T5virus; unclassified T5likevirus.                |
| Shigella phage Sf14           | MF327003              | 87575 bp           | linear      | Viruses; unclassified bacterial viruses.                                                                            |
| Shigella phage vB_SflS-ISF001 | MG049919              | 50552 bp           | linear      | Viruses; dsDNA viruses, no RNA stage; Caudovirales; Siphoviridae.                                                   |
| Shigella phage Sf23           | MF158046              | 167678 bp          | linear      | Viruses; unclassified bacterial viruses.                                                                            |
| Shigella phage Sf22           | MF158045              | 166283 bp          | linear      | Viruses; unclassified bacterial viruses.                                                                            |
| Shigella phage Sf18           | MF158044              | 90270 bp           | linear      | Viruses; unclassified bacterial viruses.                                                                            |
| Shigella phage Sf16           | MF158043              | 88580 bp           | linear      | Viruses; unclassified bacterial viruses.                                                                            |
| Shigella phage Sd1            | MF158042              | 48262 bp           | linear      | Viruses; unclassified bacterial viruses.                                                                            |
| Shigella phage Sf15           | MF158041              | 88474 bp           | linear      | Viruses; unclassified bacterial viruses.                                                                            |
| Shigella phage Sf13           | MF158040              | 87570 bp           | linear      | Viruses; unclassified bacterial viruses.                                                                            |
| Shigella phage Sf12           | MF158039              | 47647 bp           | linear      | Viruses; unclassified bacterial viruses.                                                                            |
| Shigella phage vB_SsoS-ISF002 | MF093736              | 50564 bp           | linear      | Viruses; dsDNA viruses, no RNA stage; Caudovirales; Siphoviridae                                                    |
| Shigella phage Sf11           | MF158038              | 46454 bp           | linear      | Viruses; unclassified bacterial viruses.                                                                            |
| Shigella phage SH7            | KX828711              | 164870 bp          | linear      | Viruses; dsDNA viruses, no RNA stage; Caudovirales; Myoviridae; Tevenvirinae; T4virus.                              |
| Shigella phage SH6            | KX828710              | 50552 bp           | linear      | Viruses; dsDNA viruses, no RNA stage; Caudovirales; Siphoviridae; Tunavirinae; T1virus; unclassified T1virus.       |
| Shigella phage SHSML-52-1     | KX130865              | 169621 bp          | linear      | Viruses; dsDNA viruses, no RNA stage; Caudovirales; Myoviridae; Tevenvirinae; Rb69virus; unclassified Rb69virus.    |
| Shigella phage SHBML-50-1     | KX130864              | 166634 bp          | linear      | Viruses; dsDNA viruses, no RNA stage; Caudovirales; Myoviridae; Tevenvirinae; T4virus.                              |
| Shigella phage SHFML-26       | KX130862              | 168993 bp          | linear      | Viruses; dsDNA viruses, no RNA stage; Caudovirales; Myoviridae; Tevenvirinae; T4virus.                              |

|                            |          |           |          |                                                                                               |
|----------------------------|----------|-----------|----------|-----------------------------------------------------------------------------------------------|
| Shigella phage SHFML-11    | KX130861 | 170650 bp | linear   | Viruses; dsDNA viruses, no RNA stage; Caudovirales; Myoviridae; Tevenvirinae; T4virus.        |
| Shigella phage pSf-2       | KP085586 | 50109 bp  | circular | Viruses; dsDNA viruses, no RNA stage; Caudovirales; Siphoviridae; Tunavirinae; T1virus        |
| Shigella phage pSs-1       | KM501444 | 164999 bp | circular | Viruses; dsDNA viruses, no RNA stage; Caudovirales; Myoviridae; Tevenvirinae; T4virus.        |
| Shigella phage Ss-VASD     | KR781488 | 62851 bp  | linear   | Viruses; dsDNA viruses, no RNA stage; Caudovirales; Podoviridae; Sepvirinae; T12011 virus     |
| Shigella phage 75/02 Stx   | KF766125 | 60875 bp  | circular | Viruses; dsDNA viruses, no RNA stage; Caudovirales; Podoviridae; Sepvirinae; Poczvirus.       |
| Shigella phage Shf125875   | KM407600 | 169062 bp | linear   | Viruses; dsDNA viruses, no RNA stage; Caudovirales; Myoviridae; Tevenvirinae; Rb69virus       |
| Shigella phage pSb-1       | KF620435 | 71629 bp  | circular | Viruses; dsDNA viruses, no RNA stage; Caudovirales; Podoviridae; G7cvirus.                    |
| Shigella phage POCJ13      | KJ603229 | 62699 bp  | linear   | Viruses; dsDNA viruses, no RNA stage; Caudovirales; Podoviridae; Sepvirinae; Poczvirus.       |
| Shigella phage pSf-1       | KC710998 | 51821 bp  | linear   | Viruses; dsDNA viruses, no RNA stage; Caudovirales; Siphoviridae                              |
| Shigella phage SfIV        | KC814930 | 39758 bp  | linear   | Viruses; dsDNA viruses, no RNA stage; Caudovirales; Myoviridae                                |
| Shigella phage SfII        | KC736978 | 41475 bp  | linear   | Viruses; dsDNA viruses, no RNA stage; Caudovirales; Myoviridae                                |
| Shigella phage EP23        | JN984867 | 44077 bp  | linear   | Viruses; dsDNA viruses, no RNA stage; Caudovirales; Siphoviridae; Hk578virus                  |
| Shigella phage phiSboM-AG3 | FJ373894 | 158006 bp | linear   | Viruses; dsDNA viruses, no RNA stage; Caudovirales; Ackermannviridae; Aglimvirinae; Ag3virus. |
| Shigella phage Shf12       | HM035025 | 165919 bp | circular | Viruses; dsDNA viruses, no RNA stage; Caudovirales; Myoviridae; Tevenvirinae; T4virus         |
| Shigella phage Shf11       | HM035024 | 50661 bp  | circular | Viruses; dsDNA viruses, no RNA stage; Caudovirales; Siphoviridae; Tunavirinae; T1virus.       |
| Shigella phage SP18        | GQ981382 | 170605 bp | linear   | Viruses; dsDNA viruses, no RNA stage; Caudovirales; Myoviridae; Tevenvirinae; Sp18virus       |
